# Supplementary material for: Synthesis of [211At]4-astato-L-phenylalanine by dihydroxyboryl-astatine substitution reaction in aqueous solution
Source: Sci Rep. 2021 Jun 21;11:12982. doi: 10.1038/s41598-021-92476-6 (PMC8217504; doi:10.1038/s41598-021-92476-6)
Supplement: Supplementary file 1 — Supplementary Information. [file 41598_2021_92476_MOESM1_ESM.pdf]

# **Synthesis of [ $^{211}\text{At}$ ]4-astato-L-phenylalanine by dihydroxyboryl-astatine substitution reaction in aqueous solution**

Yoshifumi Shirakami,<sup>1,2\*</sup> Tadashi Watabe,<sup>1,3</sup> Honoka Obata,<sup>4</sup> Kazuko Kaneda,<sup>1</sup> Kazuhiro Ooe,<sup>1,3</sup> Yuwei Liu,<sup>3</sup> Takahiro Teramoto,<sup>1</sup> Atsushi Toyoshima,<sup>1</sup> Atsushi Shinohara,<sup>1,3</sup> Eku Shimosegawa,<sup>5</sup> Jun Hatazawa,<sup>2</sup> and Koichi Fukase<sup>1,4</sup>

## **FIGURES**

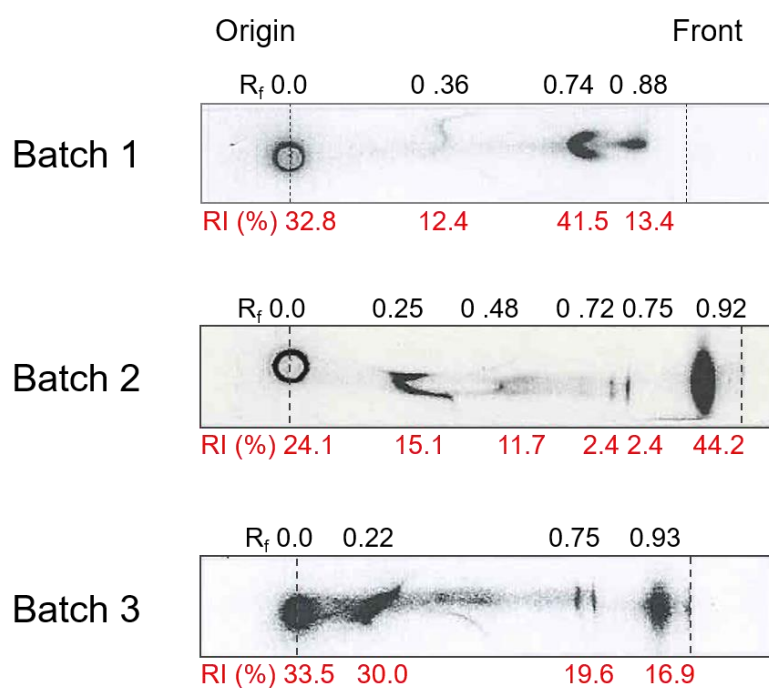

**Fig. S1 Thin layer chromatogram of aqueous solution of  $^{211}\text{At}$**

The radioactivity profiles of the chromatograms varied from batch to batch.

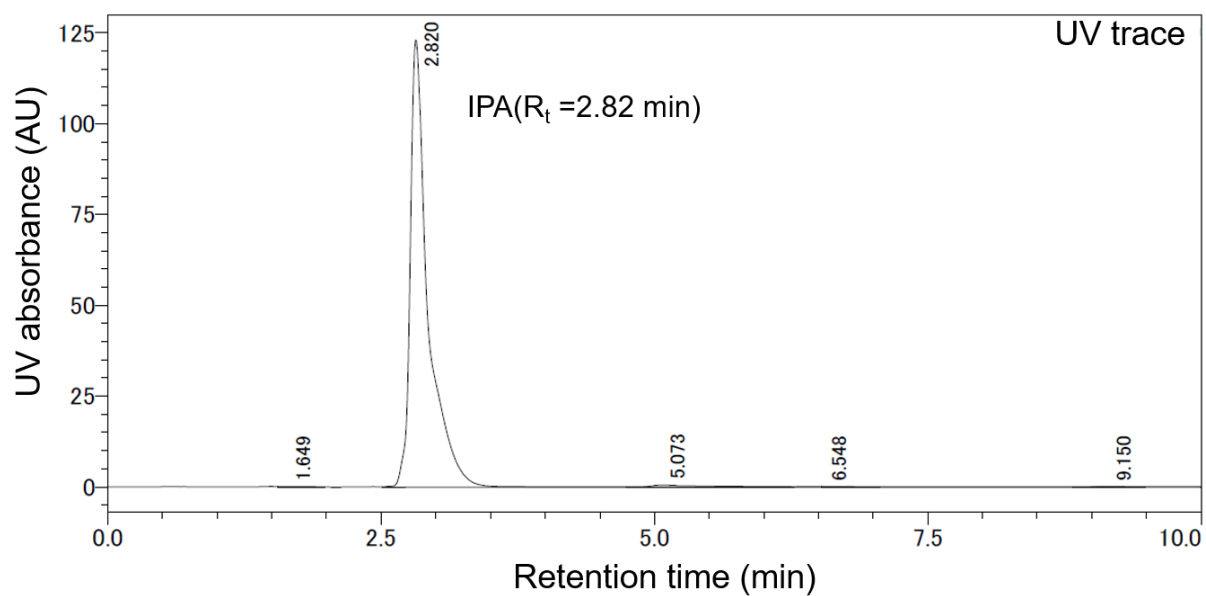

**Fig. S2 HPLC profiles of 4-iodo-L-phenylalanine (IPA)**

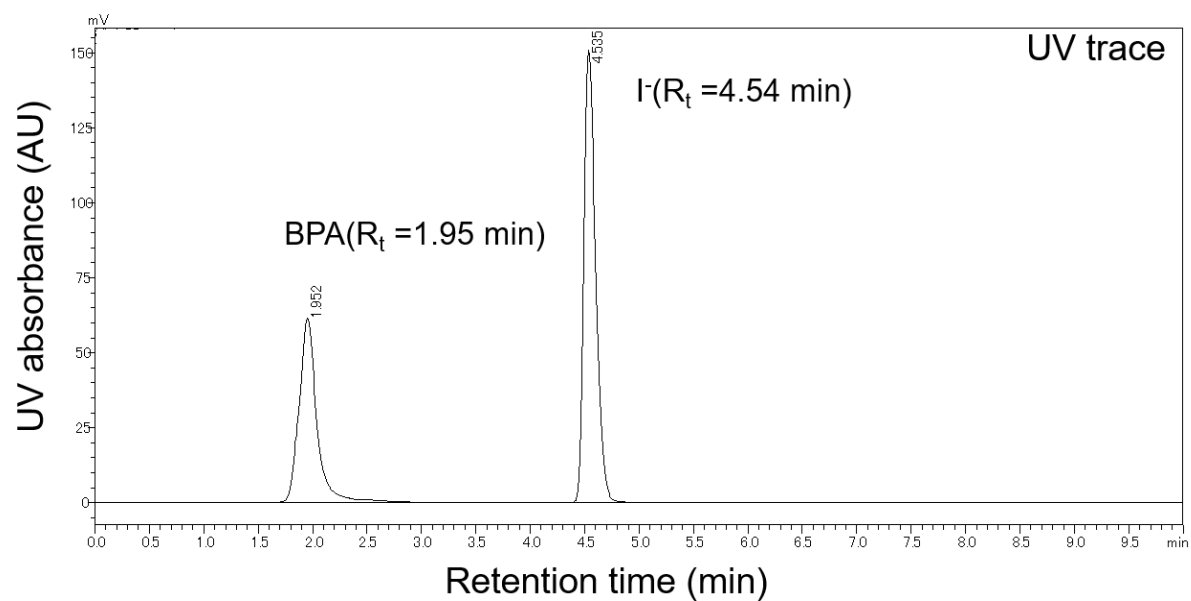

**Fig. S3 HPLC profile of 1:1 mixture of BPA and KI**

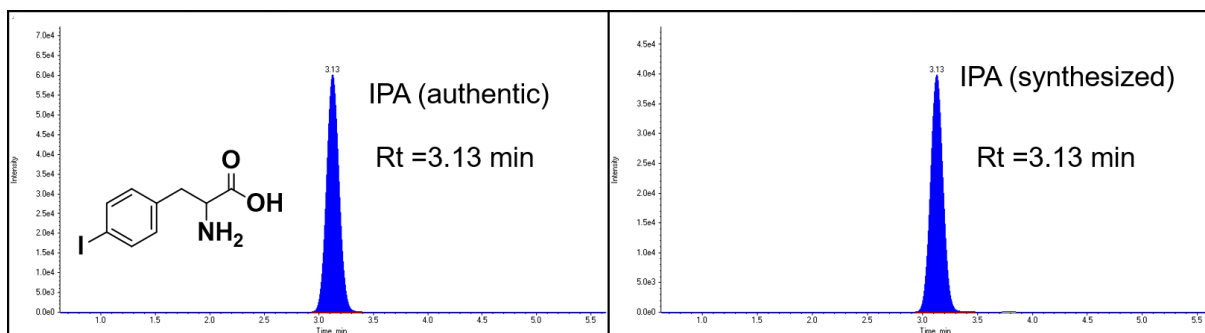

**Fig. S4 LC-MS analysis of IPA**

Authentic reference (left) and synthesized product from the boron-iodine substitution reaction between BPA and NaI (right).

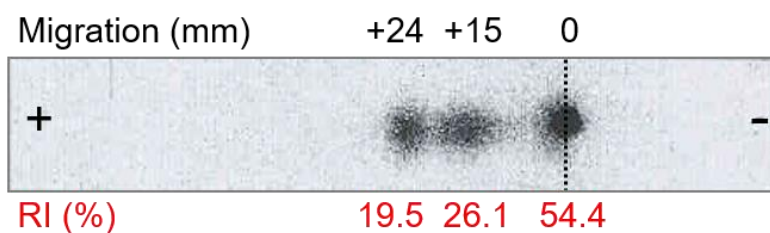

**Fig. S5. Electrophoresis of aqueous solution of  $^{211}\text{At}$**

Strip: Cellulose acetate film, Electrolyte: 0.06 mol/L barbital buffer, pH 8.5,  
Constant voltage: 133 V, Constant current: 1 mA/cm, Time duration: 20 min

Three radioactive species were detected in the aqueous solution of  $^{211}\text{At}$ . Two of them were negatively charged ions having migration distances of +15 mm and +24 mm. The third species was neutral and remained on the origin line (0 mm).

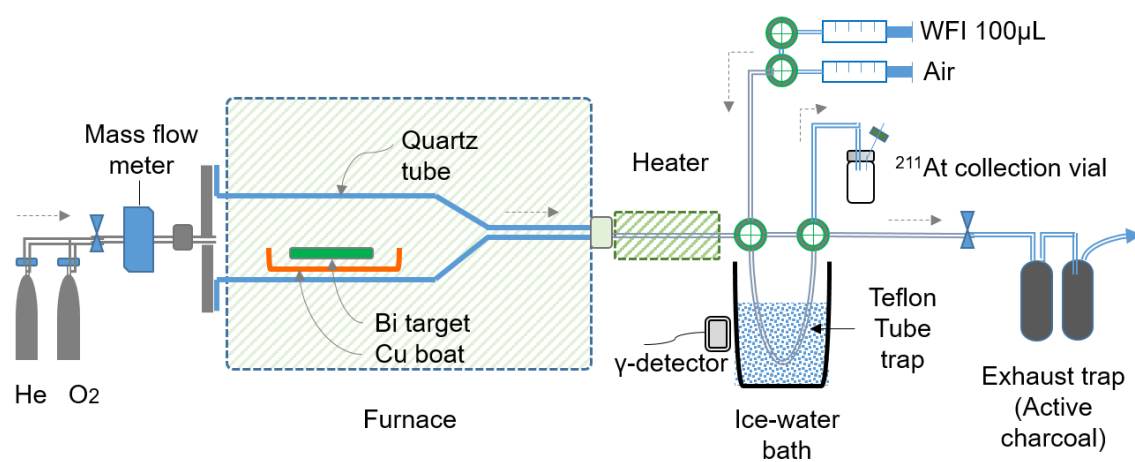

**Fig. S6 Apparatus for dry-distillation of  $^{211}\text{At}$**
